# Global brain signal in awake rats

Yuncong Ma<sup>a</sup>, Zilu Ma<sup>a</sup>, Zhifeng Liang<sup>a,c</sup>, Thomas Neuberger<sup>a,b</sup>, Nanyin Zhang<sup>a,b,\*</sup>

<sup>a</sup> Department of Biomedical Engineering, The Pennsylvania State University, University Park,  
PA, USA

<sup>b</sup> The Huck Institutes of the Life Sciences, The Pennsylvania State University, University Park,  
PA, USA

<sup>c</sup> Current address: Institute of Neuroscience, Chinese Academy of Science, Shanghai, China

## \*Address for correspondence:

Nanyin Zhang, PhD

Professor of Biomedical Engineering and Electrical Engineering

Lloyd & Dorothy Foehr Huck Chair in Brain Imaging

The Huck Institutes of the Life Sciences

The Pennsylvania State University

W-341 Millennium Science Complex, University Park, PA 16802, USA

Email: [nuz2@psu.edu](mailto:nuz2@psu.edu)

## Acknowledgments

The present study was partially supported by National Institute of Neurological Disorders and Stroke (R01NS085200, PI: Nanyin Zhang, PhD) and National Institute of Mental Health (R01MH098003 and RF1MH114224, PI: Nanyin Zhang, PhD).

**Conflict of interest:** none.

**Keywords:** Global Signal, resting-state fMRI, awake, rat

28 **Compliance with Ethical Standards**

29

30

- **Conflict of interest:** none.

31

- **Research involving Human Participants and/or Animals:** The research involved animals. All procedures were conducted in accordance with approved protocols from the Institutional Animal Care and Use Committee (IACUC) of the Pennsylvania State University.

32

33

34

35

- **Informed consent:** N/A

36

37

- **Funding:** The present study was supported by National Institute of Neurological Disorders and Stroke (R01NS085200, PI: Nanyin Zhang, PhD) and National Institute of Mental Health (R01MH098003 and RF1MH114224, PI: Nanyin Zhang, PhD).

38

39

40

41

## 42 **Abstract**

43           Although often used as a nuisance in resting-state functional magnetic resonance  
44 imaging (rsfMRI), the global brain signal in humans and anesthetized animals has important  
45 neural basis. However, our knowledge of the global signal in awake rodents is sparse. To bridge  
46 this gap, we systematically analyzed rsfMRI data acquired with a conventional single-echo (SE)  
47 echo planar imaging (EPI) sequence in awake rats. The spatial pattern of rsfMRI frames during  
48 peaks of the global signal exhibited prominent co-activations in the thalamo-cortical and  
49 hippocampo-cortical networks, as well as in the basal forebrain, hinting that these neural  
50 networks might contribute to the global brain signal in awake rodents. To validate this concept,  
51 we acquired rsfMRI data using a multi-echo (ME) EPI sequence and removed non-neural  
52 components in the rsfMRI signal. Consistent co-activation patterns were obtained in extensively  
53 de-noised ME-rsfMRI data, corroborating the finding from SE-rsfMRI data. Furthermore, during  
54 rsfMRI experiments we simultaneously recorded neural spiking activities in the hippocampus  
55 using GCaMP-based fiber photometry. The hippocampal calcium activity exhibited significant  
56 correspondence with the global rsfMRI signal. These data collectively suggest that the global  
57 rsfMRI signal contains significant neural components that involve coordinated activities in the  
58 thalamo-cortical and hippocampo-cortical networks. These results provide important insight into  
59 the neural substrate of the global brain signal in awake rodents.

60

## 61 **Introduction**

62           Compelling evidence suggests that the intrinsic brain activity plays an essential role in  
63 brain function. For instance, this spontaneously fluctuating brain activity consumes a major  
64 portion of brain's energy budget (termed as brain's dark energy (Raichle 2010)), much higher  
65 than that used for external tasks (Raichle 2006), and anomalies in intrinsic brain activity are  
66 tightly linked to brain disease (Zhang and Raichle 2010). The prominent utility of intrinsic brain  
67 activity, typically measured by resting state functional magnetic resonance imaging (rsfMRI), is  
68 to assess inter-areal resting-state functional connectivity (RSFC) (Biswal et al. 1995). Given its  
69 simplicity, whole-brain coverage and sensitivity, this method has been widely applied in human  
70 and animal studies and has revolutionized our understanding of brain network organization  
71 (Biswal et al. 2010; Smith et al. 2009; Liang et al. 2011).

72           An interesting research topic in intrinsic brain activity is the global brain signal, which is  
73 defined as the averaged rsfMRI signal across all brain voxels. The global signal was initially  
74 introduced as a nuisance to regress out in rsfMRI data preprocessing (Aguirre et al. 1997). The  
75 rationale underlying global signal regression is that distributed spontaneous neural activities are  
76 semi-random and out of phase, which will be cancelled out when rsfMRI signal is averaged  
77 across the whole brain. Therefore, the global rsfMRI signal can be treated as a nuisance  
78 dominated by non-neural fluctuations. Indeed, vascular signals from large veins show high  
79 temporal correlation to the global signal (Colenbier et al., 2019). As RSFC is assessed by  
80 temporal correlations between distributed rsfMRI signals, it is particularly susceptible to non-  
81 neural confounds like head motion (Van Dijk et al. 2012; Power et al. 2012; Power et al. 2015;  
82 Satterthwaite et al. 2012), respiration (Birn et al. 2008) and cardiac pulsation (Chang et al. 2009),  
83 which all affect the rsfMRI signal globally and can cause systematic bias in RSFC quantification

84 (Liu 2016). Therefore, regressing out the global rsfMRI signal represents an effective method for  
85 removing these non-neural artifacts (Ciric et al. 2018), and has been widely used (Fox et al.  
86 2005).

87 Despite its effectiveness, doubt has been casted on the rationale of global signal  
88 regression (Murphy et al. 2009) and it has been suggested that the global signal might have  
89 important neural components (Liu et al. 2018; Turchi et al. 2018; Scholvinck et al. 2010; Yang  
90 et al. 2014). Simultaneous recordings of electrophysiology and rsfMRI data revealed  
91 synchronized neural activity across the brain, which was also strongly correlated to brain-wide  
92 rsfMRI signals (Wen and Liu 2016; Scholvinck et al. 2010), showing that the global signal has  
93 neural basis. In addition, a series of studies reported that the global brain signal was tightly linked  
94 to the vigilance level in human subjects (Rack-Gomer and Liu 2012; Wong et al. 2012, 2013;  
95 Chang et al. 2016a; Liu et al. 2018), which suggests that the global signal plays an important  
96 functional role. Furthermore, altered global brain signal was reported in patients with  
97 schizophrenia, indicating that the global signal could be an endophenotype of psychiatric  
98 disorders (Yang et al. 2017; Yang et al. 2014). Taken together, these studies have greatly  
99 advanced our understanding of the neural basis and physiologic function of the global signal in  
100 humans.

101 Recent studies in anesthetized animals have also shed light on potential neural  
102 contributions to the global signal. Wide field imaging of calcium signals showed synchronized  
103 neural activation across a large proportion of the cortex (Ma et al. 2016; Matsui et al. 2016). In  
104 addition, brain's co-activation patterns in mice demonstrated specific phase relationship to the  
105 global signal fluctuation (Gutierrez-Barragan et al., 2018). However, our knowledge of the global  
106 signal in awake rodents is still lacking. Investigating this issue in awake animals is important as

107 it avoids the potential confounding effects of anesthesia on animals' physiologic states and the  
108 global signal (Gao et al. 2016; Liang et al. 2012b; Liang et al. 2015a; Ma et al. 2017; Smith et al.  
109 2017; Hamilton et al. 2017), and permits linking brain activity measured to behavior (Liang et al.  
110 2014; Dopfel et al. 2019). To bridge this gap, here we systematically investigate the global brain  
111 signal using the awake rat fMRI approach established in our lab (Liang et al. 2011; Zhang et al.  
112 2010; Perez et al. 2018; Dopfel and Zhang 2018). We first examine the spatial patterns of rsfMRI  
113 volumes during peaks of the global signal. Our data demonstrate that the global signal in awake  
114 rats might be linked to coordinated neural activities in the thalamo-cortical and hippocampo-  
115 cortical networks. To confirm this concept, we acquire rsfMRI data using a multi-echo (ME) echo  
116 planar imaging (EPI) sequence and use its advantage to remove non-neural components in  
117 rsfMRI signal (Kundu et al. 2013; Kundu et al. 2012; Kundu et al. 2014). Consistent co-activation  
118 patterns are obtained in extensively de-noised ME-rsfMRI data. Furthermore, during rsfMRI  
119 experiments we simultaneously record spiking activities in the hippocampus using GCaMP-  
120 based fiber photometry and find significant correspondence between hippocampal calcium  
121 signal and the global rsfMRI signal. These data collectively suggest that the global signal in  
122 awake rodents contains important neural components involving activities in the thalamo-cortical  
123 and hippocampo-cortical networks.

124

## 125 **Methods and Materials**

### 126 **Animal Preparation**

127 All procedures were conducted in accordance to approved protocols from the Institutional  
128 Animal Care and Use Committee (IACUC) of the Pennsylvania State University. 92 adult male  
129 Long-Evans rats (250-500g) were used in this study. 71 rats (133 scans) were scanned using

130 single-echo rsfMRI (SE-rsfMRI), and 21 rats (43 scans) were scanned using ME-rsfMRI. Part of  
131 the SE-rsfMRI data were used in previous publications (Ma et al. 2018; Ma and Zhang 2018)  
132 and was reprocessed for the purpose of the present study. All animals were housed and  
133 maintained on a 12hr light: 12hr dark schedule, and provided access to food and water *ad libitum*.

134 To minimize stress and motion during imaging at the awake state, animals were  
135 acclimated to the scanning environment for 7 days (see details described in (Dopfel and Zhang  
136 2018; Gao et al. 2016)). Briefly, rats were briefly anesthetized (5 min) under isoflurane (2-4%)  
137 and placed in a body and head restrainer. After this setup, isoflurane was discontinued, and  
138 animals were allowed to regain full consciousness. The restrainer with the animal was then  
139 placed in a mock MRI scanner where prerecorded sounds of MRI pulse sequences were played.  
140 The exposure time started from 15 min on day 1, and was incrementally increased by 15 min  
141 each day (days 2 and 3) up to 60 minutes (days 4, 5, 6 and 7). This setup mimicked the scanning  
142 condition inside the magnet. A similar acclimation approach has also been used by other  
143 research groups (Bergmann et al. 2016; Yoshida et al. 2016; Chang et al. 2016b).

144

## 145 **MRI Experiments**

146 Using the method described in the acclimation procedure, rats were placed in an identical  
147 head restrainer with a built-in birdcage radiofrequency coil. Isoflurane was discontinued after the  
148 animal was set up. Imaging began ~30min after rats were placed in the scanner while they were  
149 fully awake. Image acquisition was performed at the High Field MRI Facility at the Pennsylvania  
150 State University on a 7T Bruker 70/30 BioSpec running ParaVision 6.0.1 (Bruker, Billerica, MA).  
151 After a localizer scan, T1-weighted structural images were acquired using a rapid imaging with  
152 refocused echoes (RARE) sequence with the following parameters: repetition time (TR) =

153 1500ms, echo time (TE) = 8ms, matrix size =  $256 \times 256$ , field of view (FOV) =  $3.2 \times 3.2 \text{ cm}^2$ ,  
154 slice number = 20, slice thickness = 1mm, RARE factor = 8, and repetition number = 8. For the  
155 SE-rsfMRI experiment, one to three SE-rsfMRI scans were acquired using a single-shot  
156 gradient-echo EPI pulse sequence with the following parameters: TR = 1000ms, TE = 15ms, flip  
157 angle =  $60^\circ$ , matrix size =  $64 \times 64$ , FOV =  $3.2 \times 3.2 \text{ cm}^2$  (in-plane resolution =  $0.5 \times 0.5 \text{ mm}^2$ ),  
158 slice number = 20, slice thickness = 1 mm. 600 SE-rsfMRI volumes (10 min) were acquired for  
159 each SE-rsfMRI scan.

160 21 animals (body weight =  $307 \pm 19 \text{ g}$ ) were scanned in an ME-rsfMRI experiment. The  
161 setup was the same as the SE-rsfMRI experiment. As the scanner noise was louder for the ME-  
162 EPI sequence, earplugs were used in rats to reduce acoustic noise during ME-rsfMRI data  
163 acquisition. For each animal, one to three ME-rsfMRI scans were acquired using a single-shot  
164 ME-EPI sequence (Fig. 1A) with TR = 1500 ms, TEs = 7.6, 16.4, 25.2 and 34.0 ms, flip angle =  
165  $75^\circ$ , matrix size =  $48 \times 32$ , FOV =  $2.4 \times 1.6 \text{ cm}^2$  (in-plane resolution =  $0.5 \times 0.5 \text{ mm}^2$ ), slice  
166 number = 18, slice thickness = 1 mm. 400 ME-rsfMRI volumes (10 min) were acquired for each  
167 ME-EPI scan.

168

## 169 **Data Analysis**

170 Analyses of SE-rsfMRI and ME-rsfMRI data were carried out using MATLAB 2017b (The  
171 MathWorks, Inc., Natick, MA). Mathematica 11.3 (Wolfram Research, Inc., Champaign, IL),  
172 MATLAB and ITK-SNAP (Yushkevich et al. 2006) were used for data visualization.

173

### 174 *SE-rsfMRI data preprocessing*

175 SE-rsfMRI data were preprocessed using the pipeline described in our previous



176 publications (Ma et al. 2018; Liang et al. 2012a; Liang et al. 2013; Liang et al. 2015b; Liu and  
177 Zhang 2019). First, head motion was estimated by frame-wise displacement (FD) in each rsfMRI  
178 scan (Power et al. 2012). Volumes with large FD ( $> 0.2\text{mm}$ ) and their immediate preceding and  
179 following volumes were removed. The first 10 rsfMRI volumes were also removed to ensure  
180 steady-state magnetization. SE-rsfMRI scans with  $>10\%$  volumes scrubbed were excluded from  
181 further analysis. Subsequently, the procedures of co-registration, spatial smoothing (Gaussian  
182 kernel, FWHM =  $0.75\text{mm}$ ), motion-correction, nuisance regression of 6 motion parameters (3  
183 translational and 3 rotational parameters) and signals from the white matter and ventricles were  
184 respectively applied.

185

#### 186 *ME-rsfMRI data preprocessing*

187 ME-rsfMRI data were used to separate neural and non-neural signals in rsfMRI data  
188 (Kundu et al. 2013; Kundu et al. 2012; Kundu et al. 2014). This capacity is based on the premise  
189 that neural activity-induced blood-oxygenation-level dependent (BOLD) signal change is TE  
190 dependent, as BOLD changes originate from alterations in paramagnetic deoxy-hemoglobin  
191 concentrations, which lead to changes in  $T^*_2$  values. An innovative feature of the ME-EPI method  
192 is that each rsfMRI volume was acquired at multiple TEs, which allowed us to examine voxel-  
193 wise TE dependency of rsfMRI signal (see below).

194 Preprocessing of ME-rsfMRI data was similar to SE-rsfMRI data. The same motion  
195 scrubbing method described above was used to remove volumes with  $\text{FD} > 0.2 \text{ mm}$ . The first  
196 10 volumes were also removed to ensure steady-state magnetization. ME-rsfMRI scans with  $>$   
197  $10\%$  volumes scrubbed were excluded from further analysis. Motion parameters were then  
198 estimated using moderately smoothed EPI images (FWHM= $0.75\text{mm}$ ) acquired at the first echo.

199 Subsequently, we combined estimated matrices of motion parameters and the affine matrix from  
200 co-registration, and applied the combined matrix to each volume in EPI. After that, images were  
201 spatially smoothed (Gaussian kernel, FWHM = 0.75mm). The time course of each voxel was  
202 detrended, and 6 motion parameters were regressed out.

203 To separate neural and non-neural signals, we employed a similar method established  
204 by Kundu et. al. (Kundu et al. 2013; Kundu et al. 2012; Kundu et al. 2014), including the steps  
205 of optimally combining ME data, spatial group ICA, dual-regression back reconstruction, and  
206 computation of BOLD and non-BOLD weighting for each ICA component.

207 For each voxel in ME-rsfMRI images, Eq. 1 describes the MR signal as a function of  $TE$ ,  
208 where  $S(TE)$  is the signal amplitude at  $TE$ ,  $S_0$  is the signal amplitude when  $TE$  is zero, and  $T2^*$   
209 is the time constant for  $T2^*$  relaxation. For each scan, the rsfMRI signal of each brain voxel was  
210 averaged across volumes for each  $TE$ , and  $T2^*$  was estimated by fitting signals at four  $TE$ s to  
211 Eq. 1. Then, signals acquired at four  $TE$ s were weighted averaged with the weight quantified  
212 using Eq. 2, where  $W_{TE_i}$  is the weight for the  $i$ -th  $TE$  ( $TE_i$ ). This step maximized the contrast-to-  
213 noise ratio of rsfMRI data for group-ICA.

$$214 \quad S(TE) = S_0 e^{-\frac{TE}{T2^*}} \quad \text{Eq. 1}$$

$$215 \quad W_{TE_i} = \frac{TE_i \cdot e^{-\frac{TE_i}{T2^*}}}{\sum_{i=1}^4 TE_i \cdot e^{-\frac{TE_i}{T2^*}}} \quad \text{Eq. 2}$$

216 Spatial group-ICA was subsequently applied to optimally combined ME-rsfMRI data to  
217 generate group-level independent components using GIFT v3.0b (component number = 100,  
218 Fig. 1C) (Calhoun et al. 2001). Spatial maps and the corresponding time courses of all ICA  
219 components were then generated for each individual scan using dual regression back  
220 reconstruction (Calhoun et al. 2001).

221 To differentiate neural and non-neural components in ME-rsfMRI data, BOLD ( $\kappa$ ) and non-  
222 BOLD ( $\rho$ ) weights of each ICA component were decided.  $\kappa$  and  $\rho$  were pseudo- $F$ -statistics that  
223 measured how likely the BOLD signal changes were due to the change of  $T_2^*$  (BOLD) or  $S_0$  (non-  
224 BOLD) in Eq. [1], as BOLD signal changes were  $T_2^*$  dependent, whereas non-BOLD changes  
225 were not. Specifically, the first order approximation of Eq. [1] can be further separated into two  
226 linear sub-models:

227 BOLD components:  $\frac{\Delta S(TE)}{S(TE)} = -\Delta R_2^* \cdot TE$  Eq. 3

228 Non-BOLD components:  $\frac{\Delta S(TE)}{S(TE)} = \frac{\Delta S_0}{S_0}$  Eq. 4

229 where  $\Delta S(TE)/S(TE)$  is the signal change at a given TE. Signal changes of each voxel at different  
230 TEs were fit to the two sub-models, and goodness-of-fit ( $F$ ) for Eq. 3 and 4 was calculated (i.e.  
231  $F_{R_2^*}$  and  $F_{S_0}$ ), respectively. The  $\kappa$  and  $\rho$  weights for each ICA component were obtained by  
232 weighted averaging  $F_{R_2^*}$  or  $F_{S_0}$  of all voxels of a component using the voxel's ICA component  
233 weight (i.e.  $z$  value) as the weighting. BOLD components had high  $\kappa$ , whereas non-BOLD  
234 components had high  $\rho$ . Fig. 1B shows the  $\rho$  and  $\kappa$  values for all ICA components, with  $\rho$  being  
235 sorted from the smallest to the largest. The elbow point of the sorted curve was noted as  $\rho_{elbow}$   
236 ( $= 6.43$ ). All ICA components meeting the criteria of  $\kappa > \rho$  and  $\rho < \rho_{elbow}$  were considered as  
237 BOLD components (79 in total, referred to as neural components hereafter), and all other  
238 components were recognized as non-BOLD components (21, Fig. 1C, referred to as non-neural  
239 components hereafter). Notably, these criteria were highly stringent for defining neural  
240 components. Dual regression back reconstruction was performed to derive the time courses of  
241 ICA components for each individual scan. Lastly, time courses of all non-BOLD components and  
242 the white matter signal were regressed out from optimally combined ME-rsfMRI data for each

243 scan.

244

#### 245 *Generating global signal co-activation patterns*

246 For each rsfMRI scan, the time course of each voxel was first normalized to its mean, and  
247 the global signal was calculated as the average of normalized time courses across all brain  
248 voxels, and then temporally filtered to 0.01-0.1Hz. 15% rsfMRI volumes with the highest global  
249 signal amplitude were selected for each scan, pooled together across all scans, and averaged  
250 to generate the global signal co-activation pattern (CAP). In addition, k-means clustering was  
251 applied to group these selected rsfMRI volumes based on their spatial similarity, and the mean  
252 CAP for each cluster was calculated. The same processing procedures were separately applied  
253 to SE-rsfMRI and ME-rsfMRI data.

254

#### 255 *Extracting spatiotemporal patterns of the global signal*

256 To further investigate the spatiotemporal dynamics of the global signal, we extended our  
257 analysis to rsfMRI epochs surrounding local global signal peaks. Each global signal epoch was  
258 defined as rsfMRI volumes (9 s in duration) centered at a local global signal peak. Global signal  
259 epochs overlapping with each other were excluded from the analysis to ensure data  
260 independency. The volumes used for global epochs accounted for 55.8% of the total number of  
261 volumes in ME-rsfMRI data, and explained 75.0% of variance in the global signal. All global  
262 signal epochs were averaged to generate the mean spatiotemporal patterns of the global signal.  
263 This procedure was separately applied to SE-rsfMRI and ME-rsfMRI data. All global signal  
264 epochs were subjected to spatial group ICA to further extract individual brain networks involved  
265 in the global signal.

266

267 *Surgery for calcium signal recording*

268 rsfMRI and calcium signal signals were simultaneously recorded (n = 4) using the method  
269 previously reported (Liang et al. 2017). Before imaging, stereotaxic surgery was conducted for  
270 virus injection and optic fiber implantation. Rats (350 – 450 g) were anesthetized by  
271 intramuscular (IM) injections of ketamine (40 mg/kg) and xylazine (12 mg/kg). Buprenorphine  
272 (1.0mg/kg) was injected subcutaneously (SC) as long-term post-surgery analgesia.  
273 Dexamethasone (0.5 mg/kg) was injected SC to prevent tissue inflammation. Rats were  
274 intubated with endotracheal catheter with a fiber-optic guide (Rivera et al. 2005), placed on a  
275 stereotaxic frame (David Kopf Instruments, Tujunga, CA), and ventilated with oxygen. The  
276 animal's heart rate and SpO<sub>2</sub> were monitored and the body temperature was maintained at 37°C  
277 during surgery. A small craniotomy was made unilaterally over the dorsal hippocampus (dentate  
278 gyrus, 3.5 mm rostral and 2 mm lateral to bregma). AAV5.Syn.GCaMP6s (800-1000 nl, Penn  
279 Vector Core) was injected through a micropipette syringe fitted with a glass pipette tip (Hamilton  
280 Company, Reno, NV) at three depths: -2.6 mm, -2.8 mm, and -3.0 mm (~300 nl at each depth).  
281 After virus injection, a fiber optic (400 μm core, 0.48NA, 2.5mm ceramic ferrule, Thorlabs,  
282 Newton, NJ) was advanced to the injection site (depth: -2.6 mm). Five screws (0.06 inch in  
283 diameter, 0.125 inch in length, brass; McMaster-Carr, Aurora, OH) were implanted along the  
284 temporal ridge of the rat skull. Dental adhesive and dental cement (ParaBond, COLTENE,  
285 Cuyahoga Falls, OH) were applied to cover the skull and fix the implanted fiber. Rats were  
286 returned to home cages, and allowed for recovery and GCaMP expression for at least 4 weeks.

287

288 *Simultaneous calcium-rsfMRI signal recording*

289 A two-wavelength GCaMP fiber photometry system (Doric Lenses Inc., Quebec, Canada)

290 was utilized for calcium signal recording (Fig. 2A) (Kim et al. 2016). GCaMP and  $\text{Ca}^{2+}$ -  
291 independent fluorescent signals were alternately excited by a 465nm (7 $\mu\text{W}$ ) LED and an  
292 isosbestic wavelength (405 nm, 0.75 $\mu\text{W}$ ) LED, respectively, both modulated at 400Hz (50% duty  
293 cycle for each wavelength). Power for the two LEDs was adjusted to achieve comparable  
294 intensity of emitted fluorescent light for the two channels due to the different absorption rate of  
295 the two wavelengths in the brain tissue and different light efficiency in the optic setup. Both  
296 excitation sources were combined via a dichroic mirror in a mini-cube and coupled into a mono  
297 fiber optic patch cable (400 nm core, 0.48NA, 7m long, Doric Lenses Inc., Quebec, Canada)  
298 connected with the implanted optical fiber. Emitted fluorescent light was collected through the  
299 same patch cable, separated by another dichroic mirror in the mini-cube, coupled via a fiber  
300 launch (Thorlabs, Newton, NJ) and a 40 $\times$ 0.65 NA microscope objective (Olympus, Center Valley,  
301 PA), and then focused into a photomultiplier (MiniSM 30035, SensL Technologies, Somerville,  
302 MA). The converted signal was amplified (bandpass filtered at 0.3-1kHz, Dagan Corp.,  
303 Minneapolis, MN) and recorded using an NI-DAQ board (10kHz sampling rate, NI USB-6211,  
304 National Instruments, Austin, TX) and custom-written LabVIEW code. TTL signals used to  
305 control the two LED modules were also recorded. We used a time-division multiplexing strategy  
306 to time-sequentially sample 465 nm and 405 nm excited fluorescent signals (Fig. 2). 405 nm  
307 signals were regressed out from 465 nm signals to correct for fluorescence changes unrelated  
308 to neuronal activity (Kim et al. 2016).

309 Along with GCaMP signal, SE-rsfMRI signal was simultaneously collected using the same  
310 imaging parameters mentioned above. We acquired 1-3 scans in each session. For each animal,  
311 we performed multiple sessions on separate days, which provided 20 scans in total.

312

## 313 **Results**

314 In this study we systematically investigated the global brain signal in awake rats. We first  
315 examined the spatial patterns of rsfMRI volumes at global signal peaks. The neural components  
316 in the global signal spatial pattern were further investigated using ME-rsfMRI data and  
317 simultaneously recorded calcium signal.

318

### 319 *Co-activation patterns of the global rsfMRI signal*

320 Fig. 3 shows the mean CAP generated by averaging 15% rsfMRI volumes with the highest  
321 global signal amplitude. This global signal CAP displayed well-organized network activities  
322 mainly involving the thalamocortical and hippocampocortical networks. In particular, regions in  
323 these two networks including the medial prefrontal, insular, anterior cingulate, retrosplenial and  
324 sensorimotor cortices, as well as medial dorsal thalamus, hippocampus and basal forebrain  
325 showed strong BOLD signal during global signal peaks. This result suggests that the global  
326 signal in awake rats might be attributed to coordinated activities in the thalamo-cortical and  
327 hippocampo-cortical networks.

328 Averaging all rsfMRI volumes selected could potentially mask distinct CAPs in the global  
329 signal. To examine this possibility, k-means clustering ( $k = 12$ ) was used to group rsfMRI  
330 volumes based on their spatial similarity (Fig. 4). Fig. 4A displayed clusters of CAPs resembling  
331 the mean global signal CAP (spatial correlation coefficient =  $0.72 \pm 0.10$ ), which accounted for  
332 79% of total rsfMRI volumes selected. In contrast, several other cluster CAPs exhibited spatial  
333 patterns quite different from the mean global signal CAP (Fig. 4B). These patterns occurred in a  
334 minor portion (21%) of rsfMRI volumes selected. None of them showed any patterns consistent  
335 with known anatomical or network structures, and therefore, might be attributed to non-neural  
336 artifacts. Taken together, our SE-rsfMRI data demonstrated that there were significant neural

337 and non-neural contributions to the global signal, even after routine signal preprocessing.

338

### 339 *Dissecting neural components in the global rsfMRI signal*

340 ME-rsfMRI was employed to further differentiate neural and non-neural components in  
341 the global rsfMRI signal. Fig. 1C shows both neural and non-neural components generated using  
342 ME-rsfMRI data. rsfMRI signals from all non-neural components were regressed out from ME-  
343 rsfMRI data, generating a de-noised rsfMRI dataset. The mean CAP of all global signal peaks  
344 was then calculated using the same method described above. Our data showed that the mean  
345 global signal pattern in de-noised ME-rsfMRI data (Fig. 5) was highly consistent with the mean  
346 global signal CAP obtained from SE-rsfMRI data (Fig. 3C), including activated regions in the  
347 thalamo-cortical and hippocampo-cortical networks, as well as the basal forebrain. Consistent  
348 results between SE- and ME-rsfMRI data further validated that the global signal in awake rats  
349 was linked to coordinated neural activities in these networks.

350

### 351 *Spatiotemporal dynamics of the global signal*

352 To examine the spatiotemporal dynamics of the global signal, we analyzed rsfMRI epochs  
353 surrounding local peaks of the global signal (9 s per epoch, Fig. 6A). Figs. 6B & 6C show the  
354 spatiotemporal patterns averaged across all global signal epochs for SE-rsfMRI and ME-rsfMRI  
355 data, respectively. As expected, the central volumes in both SE and ME-rsfMRI data were highly  
356 consistent with the mean global signal CAPs shown in Figs. 3C and 5, respectively, with strong  
357 activity in the thalamo-cortical and hippocampo-cortical networks. The involvement of these two  
358 functional networks in global signal dynamics was further validated by spatial group-ICA applied  
359 to all global signal epochs in the ME-rsfMRI dataset, which provided two prominent ICA



360 components representing the thalamo-cortical network and hippocampo-cortical network,  
361 respectively (Fig. 7).

362  
363 Fig. 6D shows frame-by-frame global signal amplitude averaged across all global signal  
364 epochs for SE- and ME-rsfMRI data, respectively. Results from both datasets displayed almost  
365 identical global signal temporal profiles, which started ~4 s before the peak, sustained for ~2-3  
366 s and then returned to baseline, with a total period of ~8s.

367

368 *Correspondence between the global rsfMRI signal and neuronal spikes in the hippocampus*

369 To further validate that the global signal involved neural activity in the hippocampo-cortical  
370 network, we concurrently recorded the spiking activity in the dentate gyrus using GCaMP-based  
371 fiber photometry and rsfMRI data in awake rats. The correspondence between the GCaMP and  
372 global rsfMRI signals was quantified by estimating the portion of global signal peaks following  
373 GCaMP peaks within the time window of 2-6 sec (i.e. hemodynamic delay).

374 To test the statistical significance of the correspondence between the calcium and global  
375 signals, we used a permutation test by randomizing the position of global signal peaks in each  
376 scan and re-calculated the co-occurrence rate between the two signals. The permutation  
377 process was repeated 1000 times to obtain the null distribution of the co-occurrence rate. This  
378 statistical test demonstrated significant correspondence between neural spikes in the  
379 hippocampus and global rsfMRI signal peaks ( $p = 0.016$ ) (Fig. 8), again confirming that the global  
380 rsfMRI signal was associated with hippocampal neural activity.

381 Notably, our data showed that ~35% global signal peaks were related to hippocampal  
382 spikes, but not all. To further examine this issue, we obtained the BOLD pattern of GCaMP-  
383 corresponded global signal peaks (35% volumes, Fig. 9A) and those not corresponding to

384 GCaMP peaks (65% volumes, Fig. 9B). The data demonstrate that the spatial map of GCaMP-  
385 corresponded global signal peaks was highly consistent with the global signal pattern identified  
386 (Fig. 3), whereas the BOLD map of global signal peaks that did not correspond to hippocampal  
387 spikes displayed a less similar pattern. It needs to be noted that the latter could still be  
388 contributed by neural activity in other regions in the thalamocortical and/or hippocampal  
389 networks. Indeed, some cortical activity was observed in this pattern, but the activity in the  
390 hippocampus, medial prefrontal cortex and thalamus was largely absent. This pattern also  
391 appears noisier, consistent with our SE-rsfMRI data which showed that ~21% global signal  
392 peaks were from non-neural sources (Fig. 4).

393

#### 394 *Impact of head motion and respiration*

395 Head motion and changes of respiration rate can significantly impact the whole-brain  
396 rsfMRI data (Kalthoff et al. 2011). To rule out the potential impact of these factors on the global  
397 signal pattern, we compared the FD and respiration rate for rsfMRI frames in global signal  
398 epochs and those not in global signal epochs in ME-rsfMRI data (Fig. 10). No significant  
399 difference was observed in head motion ( $p = 0.61$ ,  $t = 0.52$ ,  $df = 84$ ) or respiration rate ( $p = 0.86$ ,  
400  $t = 0.17$ ,  $df = 84$ ), suggesting that neither head motion nor respiration had a dominant effect on  
401 the global signal pattern. In addition, the averaged motion level was on the order of 50  $\mu\text{m}$ , far  
402 less than the voxel size ( $500 \times 500 \times 1000 \mu\text{m}^3$ ), suggesting that that the overall motion level  
403 was low in our data.

404

## 405 **Discussion**

406 In the present study we systematically investigated the global brain signal in awake

407 rodents. Using SE-rsfMRI, we found that the global signal might involve neural activity in the  
408 hippocampo-cortical and thalamo-cortical networks. This finding was corroborated by ME-rsfMRI  
409 data after non-neural components were extensively removed. To further validate the neural  
410 origin of the global signal pattern, we simultaneously recorded calcium and rsfMRI data in awake  
411 rats, and found significant correspondence between neural spikes in the hippocampus and  
412 global signal peaks. Collectively, these data have filled the knowledge gap of the global brain  
413 signal in awake rodents, and provided strong evidence supporting its neural basis.

414

#### 415 *Non-neural or neural?*

416 It is well recognized that the global brain signal contains significant non-neural  
417 components including physiologic fluctuations, head motion and scanner instability (Liu et al.  
418 2017; Nalci et al. 2017). This nature makes global signal regression an effective method to  
419 remove artifacts in rsfMRI data. However, doubt has been casted on the validity of this  
420 preprocessing procedure as it has been shown that global signal regression mathematically  
421 mandates negative correlations and might cause artifactual anticorrelated RSFC (Murphy et al.  
422 2009). Studies have also shown that, besides non-neural components, the global signal has  
423 neural basis (Scholvinck et al. 2010), further suggesting that global signal regression can remove  
424 meaningful neural activity/connectivity, and thus bias RSFC quantification. At the functional level,  
425 the global signal is tightly related to vigilance in human subjects. Wong and colleagues found  
426 that the global signal amplitude was correlated to the vigilance level measured using EEG (Nalci  
427 et al. 2017; Wong et al. 2012, 2013), and could be modulated using caffeine (Rack-Gomer and  
428 Liu 2012). Recent studies further elucidated specific whole-brain CAPs during arousal level  
429 changes that were coupled to the global signal (Liu et al. 2018; Chang et al. 2016a). Moreover,

430 the global brain signal was found to be altered in patients with schizophrenia, suggesting that it  
431 may be involved in neuropathophysiology of psychiatric disorders (Yang et al. 2017; Yang et al.  
432 2014). Taken together, there is compelling evidence supporting that the global brain signal might  
433 contain significant neural components in humans and anesthetized animals.

434 Consistent with this notion, our data demonstrate that the global brain signal in awake  
435 rodents has important neural basis, which might involve coordinated neural activity in the  
436 hippocampo-cortical and thalamo-cortical networks. First, we observed strong co-activations in  
437 highly structured networks during global signal peaks in SE-rsfMRI data. These network  
438 structures consistently maintained even if we clustered rsfMRI frames based on their spatial  
439 similarity. Second, the same network activity was also observed in ME-rsfMRI after extensively  
440 removing non-neural components. Third, the global signal peaks corresponded to  
441 simultaneously measured neural spiking activity in the hippocampus. Taken together, these data  
442 have provided strong evidence supporting the neural basis of the global rsfMRI signal in awake  
443 rodents.

444

#### 445 *Functional networks involved in the global brain signal*

446 We found two prominent functional networks co-activated during global signal peaks –  
447 hippocampo-cortical and thalamo-cortical networks. Strong interactions between the  
448 hippocampus and the cortex have been reported in both rodent and monkey studies (Chan et al.  
449 2017; Logothetis et al. 2012). Such interactions are often linked to brain-wide activity and might  
450 play an important role in brain function. For instance, optogenetic stimulation of the dentate gyrus  
451 was shown to enhance brain-wide functional connectivity at the resting state in rats (Chan et al.  
452 2017). In monkeys, sharp-wave ripples in the hippocampus were tightly coupled to increased

453 activity in virtually all cortical regions, which hinted the relationship of this hippocampo-cortical  
454 co-activation and the global brain signal given the large portion of brain volume involved  
455 (Logothetis et al. 2012; Ramirez-Villegas et al. 2015). Functionally, the activity of the  
456 hippocampo-cortical network was believed to relate to the consolidation of hippocampus-  
457 dependent memory (Ramirez-Villegas et al. 2015). Like the hippocampo-cortical network, the  
458 thalamo-cortical network was also found to be involved in the global brain signal. A recent rodent  
459 study reported that low-frequency optogenetic stimulations of the ventral posteromedial  
460 thalamus led to brain-wide neural activity via both mono and multi-synaptic projections to cortical  
461 regions, alluding the potential contribution of the thalamocortical network to the global signal  
462 (Leong et al. 2016). Although specific regions involved may differ, these studies all support that  
463 activities in the hippocampo-cortical and thalamo-cortical networks play a major role in the global  
464 brain signal in rodents.

465 In addition to the two major functional networks, we observed remarkable involvement of  
466 the basal forebrain in the global brain signal. Correspondingly, recent human (Liu et al. 2018)  
467 and monkey (Turchi et al. 2018) studies demonstrated that the basal forebrain drove the brain-  
468 wide cortical activities, especially in sensory-motor areas, and regulated the global brain signal.  
469 These results collectively indicate that the global brain signal involve activities from both large-  
470 scale neural networks and small subcortical structures.

471

#### 472 *Cross-species translation*

473 There is compelling evidence demonstrating that the global brain signal is tightly related  
474 to the arousal level in both humans (Wong et al. 2013; Liu et al. 2018) and monkeys (Turchi et  
475 al. 2018; Chang et al. 2016a). It has been further suggested that the global brain signal and

476 arousal were regulated by the basal forebrain (Turchi et al. 2018). Whether these results can be  
477 translated to rodents is an interesting topic to investigate and certainly warrants more detailed  
478 studies in the future. However, some differences between these species that might affect the  
479 translation of the global brain signal need to be acknowledged. In particular, in rodents two thirds  
480 of the brain volume are subcortical regions and one third is the cortex. This composition is in  
481 remarkable contrast to primates/humans, in which cortical regions occupy the vast majority of  
482 the brain volume. Given that the global brain signal is defined by the averaged activity across  
483 the whole brain, it would have very different contributions from the cortex versus subcortex  
484 between rodents and primates/humans. Therefore, it should not be assumed that our findings in  
485 the global brain signal can be directly translated to other species.

486

#### 487 *Potential pitfalls and limitations*

488 There are a number of physiological factors that can affect rsfMRI signal and can  
489 potentially impact the global rsfMRI pattern, such as respiratory volume variability, vasomotion,  
490 brain pulsation, blood pressure, just to name a few. Although our study has been carefully  
491 designed to rule out these possibilities, including using stringent motion control, regressing out  
492 signals from the white matter and ventricles, using ME-EPI to separate non-neural components  
493 and simultaneously recording GCaMP signal in the hippocampus, caution still needs to be taken  
494 for the interpretation of the results. Specifically, it is difficult to conclude that the global signal  
495 pattern revealed is completely free from non-neural artifacts. For instance, some of the  
496 physiological factors are directly related to vascular changes, which also contribute to T2\*  
497 changes, and thus cannot be ruled out by ME-EPI. In addition, signals from large veins can  
498 contribute to the global rsfMRI signal. Nonetheless, given that the consistency of multiple

499 measurements (i.e. SE-EPI, ME-EPI and GCaMP signal), it is unlikely physiologic artifacts  
500 dominated the global brain signal pattern.

501 Although ME-rsfMRI has the advantage of differentiating neural and non-neural  
502 components, this method cannot guarantee each ICA component was completely neural or non-  
503 neural. In fact, all ICA components showed non-zero  $\kappa$  and  $\rho$  values, suggesting that they were  
504 more or less mixed with neural and non-neural constituents. In this study, we used stringent  
505 criteria to select neural components. Therefore, it is likely that some non-neural ICA components  
506 identified contained some neural elements. Nonetheless, the purpose of utilizing ME-EPI in this  
507 study is to extensively regress out non-neural components, in order to validate the results found  
508 in SE-rsfMRI data. Indeed, 28 regressors were used for de-noising ME-rsfMRI data, compared  
509 to only seven regressors used in preprocessing SE-rsfMRI data. Even with such stringent criteria,  
510 consistent results were obtained between SE-rsfMRI and ME-rsfMRI data, confirming that  
511 activities in the hippocampo-cortical and thalamo-cortical networks indeed represent neural  
512 contributions to the global signal in awake rats.

513 The present study focused on revealing the spatial pattern of brain activity when global  
514 signal was high. An equally important issue is to understand the temporal dynamics of the global  
515 signal, and a number of advanced analysis method has been applied. For instance, a recent  
516 study investigated the relationship between separate co-activation patterns and the phase of  
517 global signal (Gutierrez-Barragan et al. 2019). This issue needs to be specifically studied in the  
518 future.

519

## 520 **Conclusion**

521 We systematically investigated the global rsfMRI signal in the awake rat brain. Our data

522 suggest that the hippocampo-cortical and thalamo-cortical networks play a major role in the  
523 neural basis of the global signal. These results have filled our knowledge gap of the global brain  
524 signal in awake rodents and provided important insight into its neural substrate. The present  
525 study can further facilitate comparative studies investigating the generalized function the global  
526 signal may have across rodents and humans.

527

528

529

### 530 **References:**

- 531 Aguirre GK, Zarahn E, D'Esposito M (1997) Empirical analyses of BOLD fMRI statistics. II.  
532 Spatially smoothed data collected under null-hypothesis and experimental conditions.  
533 *Neuroimage* 5 (3):199-212
- 534 Bergmann E, Zur G, Bershadsky G, Kahn I (2016) The Organization of Mouse and Human  
535 Cortico-Hippocampal Networks Estimated by Intrinsic Functional Connectivity. *Cereb*  
536 *Cortex* 26 (12):4497-4512. doi:10.1093/cercor/bhw327
- 537 Birn RM, Smith MA, Jones TB, Bandettini PA (2008) The respiration response function: the  
538 temporal dynamics of fMRI signal fluctuations related to changes in respiration.  
539 *Neuroimage* 40 (2):644-654. doi:10.1016/j.neuroimage.2007.11.059
- 540 Biswal B, Yetkin FZ, Haughton VM, Hyde JS (1995) Functional connectivity in the motor cortex  
541 of resting human brain using echo-planar MRI. *Magn Reson Med* 34 (4):537-541
- 542 Biswal BB, Mennes M, Zuo XN, Gohel S, Kelly C, Smith SM, Beckmann CF, Adelstein JS,  
543 Buckner RL, Colcombe S, Dogonowski AM, Ernst M, Fair D, Hampson M, Hoptman MJ,  
544 Hyde JS, Kiviniemi VJ, Kotter R, Li SJ, Lin CP, Lowe MJ, Mackay C, Madden DJ, Madsen  
545 KH, Margulies DS, Mayberg HS, McMahon K, Monk CS, Mostofsky SH, Nagel BJ, Pekar  
546 JJ, Peltier SJ, Petersen SE, Riedl V, Rombouts SA, Rypma B, Schlaggar BL, Schmidt S,  
547 Seidler RD, Siegle GJ, Sorg C, Teng GJ, Veijola J, Villringer A, Walter M, Wang L, Weng  
548 XC, Whitfield-Gabrieli S, Williamson P, Windischberger C, Zang YF, Zhang HY,  
549 Castellanos FX, Milham MP (2010) Toward discovery science of human brain function.  
550 *Proc Natl Acad Sci U S A* 107 (10):4734-4739. doi:10.1073/pnas.0911855107
- 551 Calhoun VD, Adali T, Pearlson GD, Pekar JJ (2001) A method for making group inferences from  
552 functional MRI data using independent component analysis. *Hum Brain Mapp* 14 (3):140-  
553 151



- 554 Chan RW, Leong ATL, Ho LC, Gao PP, Wong EC, Dong CM, Wang X, He J, Chan YS, Lim LW,  
555 Wu EX (2017) Low-frequency hippocampal-cortical activity drives brain-wide resting-state  
556 functional MRI connectivity. *Proc Natl Acad Sci U S A* 114 (33):E6972-E6981.  
557 doi:10.1073/pnas.1703309114
- 558 Chang C, Cunningham JP, Glover GH (2009) Influence of heart rate on the BOLD signal: the  
559 cardiac response function. *Neuroimage* 44 (3):857-869.  
560 doi:10.1016/j.neuroimage.2008.09.029
- 561 Chang C, Leopold DA, Scholvinck ML, Mandelkow H, Picchioni D, Liu X, Ye FQ, Turchi JN, Duyn  
562 JH (2016a) Tracking brain arousal fluctuations with fMRI. *Proc Natl Acad Sci U S A* 113  
563 (16):4518-4523. doi:10.1073/pnas.1520613113
- 564 Chang PC, Procissi D, Bao Q, Centeno MV, Baria A, Apkarian AV (2016b) Novel method for  
565 functional brain imaging in awake minimally restrained rats. *J Neurophysiol* 116 (1):61-  
566 80. doi:10.1152/jn.01078.2015
- 567 Ciric R, Rosen AFG, Erus G, Cieslak M, Adebimpe A, Cook PA, Bassett DS, Davatzikos C, Wolf  
568 DH, Satterthwaite TD (2018) Mitigating head motion artifact in functional connectivity MRI.  
569 *Nat Protoc* 13 (12):2801-2826. doi:10.1038/s41596-018-0065-y
- 570 Dopfel D, Perez PD, Verbitsky A, Bravo-Rivera H, Ma Y, Quirk GJ, Zhang N (2019) Individual  
571 variability in behavior and functional networks predicts vulnerability using an animal model  
572 of PTSD. *Nat Commun* 10 (1):2372. doi:10.1038/s41467-019-09926-z
- 573 Dopfel D, Zhang N (2018) Mapping stress networks using functional magnetic resonance  
574 imaging in awake animals. *Neurobiol Stress* 9:251-263. doi:10.1016/j.ynstr.2018.06.002
- 575 Fox MD, Snyder AZ, Vincent JL, Corbetta M, Van Essen DC, Raichle ME (2005) The human  
576 brain is intrinsically organized into dynamic, anticorrelated functional networks. *Proc Natl*  
577 *Acad Sci U S A* 102 (27):9673-9678
- 578 Gao YR, Ma Y, Zhang Q, Winder AT, Liang Z, Antinori L, Drew PJ, Zhang N (2016) Time to  
579 wake up: Studying neurovascular coupling and brain-wide circuit function in the un-  
580 anesthetized animal. *Neuroimage*. doi:10.1016/j.neuroimage.2016.11.069
- 581 Gutierrez-Barragan D, Basson MA, Panzeri S, Gozzi A (2019) Infraslow State Fluctuations  
582 Govern Spontaneous fMRI Network Dynamics. *Curr Biol*. doi:10.1016/j.cub.2019.06.017
- 583 Hamilton C, Ma Y, Zhang N (2017) Global reduction of information exchange during anesthetic-  
584 induced unconsciousness. *Brain structure & function* 222 (7):3205-3216.  
585 doi:10.1007/s00429-017-1396-0
- 586 Kalthoff D, Seehafer JU, Po C, Wiedermann D, Hoehn M (2011) Functional connectivity in the  
587 rat at 11.7T: Impact of physiological noise in resting state fMRI. *Neuroimage* 54 (4):2828-  
588 2839. doi:S1053-8119(10)01345-5 [pii]10.1016/j.neuroimage.2010.10.053
- 589 Kim CK, Yang SJ, Pichamoorthy N, Young NP, Kauvar I, Jennings JH, Lerner TN, Berndt A, Lee  
590 SY, Ramakrishnan C, Davidson TJ, Inoue M, Bito H, Deisseroth K (2016) Simultaneous  
591 fast measurement of circuit dynamics at multiple sites across the mammalian brain.  
592 *Nature methods* 13 (4):325-328. doi:10.1038/nmeth.3770

- 593 Kundu P, Brenowitz ND, Voon V, Worbe Y, Vertes PE, Inati SJ, Saad ZS, Bandettini PA,  
594 Bullmore ET (2013) Integrated strategy for improving functional connectivity mapping  
595 using multiecho fMRI. *Proc Natl Acad Sci U S A* 110 (40):16187-16192.  
596 doi:10.1073/pnas.1301725110
- 597 Kundu P, Inati SJ, Evans JW, Luh WM, Bandettini PA (2012) Differentiating BOLD and non-  
598 BOLD signals in fMRI time series using multi-echo EPI. *Neuroimage* 60 (3):1759-1770.  
599 doi:10.1016/j.neuroimage.2011.12.028
- 600 Kundu P, Santin MD, Bandettini PA, Bullmore ET, Petiet A (2014) Differentiating BOLD and non-  
601 BOLD signals in fMRI time series from anesthetized rats using multi-echo EPI at 11.7 T.  
602 *Neuroimage* 102 Pt 2:861-874. doi:10.1016/j.neuroimage.2014.07.025
- 603 Leong AT, Chan RW, Gao PP, Chan YS, Tsia KK, Yung WH, Wu EX (2016) Long-range  
604 projections coordinate distributed brain-wide neural activity with a specific spatiotemporal  
605 profile. *Proc Natl Acad Sci U S A* 113 (51):E8306-E8315. doi:10.1073/pnas.1616361113
- 606 Liang Z, King J, Zhang N (2011) Uncovering intrinsic connective architecture of functional  
607 networks in awake rat brain. *J Neurosci* 31 (10):3776-3783
- 608 Liang Z, King J, Zhang N (2012a) Anticorrelated resting-state functional connectivity in awake  
609 rat brain. *Neuroimage* 59 (2):1190-1199. doi:S1053-8119(11)00896-2  
610 [pii]10.1016/j.neuroimage.2011.08.009
- 611 Liang Z, King J, Zhang N (2012b) Intrinsic organization of the anesthetized brain. *J Neurosci* 32  
612 (30):10183-10191. doi:10.1523/JNEUROSCI.1020-12.2012
- 613 Liang Z, King J, Zhang N (2014) Neuroplasticity to a single-episode traumatic stress revealed  
614 by resting-state fMRI in awake rats. *Neuroimage* 103:485-491.  
615 doi:10.1016/j.neuroimage.2014.08.050
- 616 Liang Z, Li T, King J, Zhang N (2013) Mapping thalamocortical networks in rat brain using  
617 resting-state functional connectivity. *Neuroimage* 83:237-244.  
618 doi:10.1016/j.neuroimage.2013.06.029
- 619 Liang Z, Liu X, Zhang N (2015a) Dynamic resting state functional connectivity in awake and  
620 anesthetized rodents. *Neuroimage* 104:89-99. doi:10.1016/j.neuroimage.2014.10.013
- 621 Liang Z, Ma Y, Watson GDR, Zhang N (2017) Simultaneous GCaMP6-based fiber photometry  
622 and fMRI in rats. *J Neurosci Methods* 289:31-38. doi:10.1016/j.jneumeth.2017.07.002
- 623 Liang Z, Watson GD, Alloway KD, Lee G, Neuberger T, Zhang N (2015b) Mapping the functional  
624 network of medial prefrontal cortex by combining optogenetics and fMRI in awake rats.  
625 *Neuroimage* 117:114-123. doi:10.1016/j.neuroimage.2015.05.036
- 626 Liu TT (2016) Noise contributions to the fMRI signal: An overview. *Neuroimage* 143:141-151.  
627 doi:10.1016/j.neuroimage.2016.09.008
- 628 Liu TT, Nalci A, Falahpour M (2017) The global signal in fMRI: Nuisance or Information?  
629 *Neuroimage* 150:213-229. doi:10.1016/j.neuroimage.2017.02.036
- 630 Liu X, de Zwart JA, Scholvinck ML, Chang C, Ye FQ, Leopold DA, Duyn JH (2018) Subcortical  
631 evidence for a contribution of arousal to fMRI studies of brain activity. *Nat Commun* 9  
632 (1):395. doi:10.1038/s41467-017-02815-3

- 633 Liu Y, Zhang N (2019) Propagations of spontaneous brain activity in awake rats. *Neuroimage*  
634 202:116176. doi:10.1016/j.neuroimage.2019.116176
- 635 Logothetis NK, Eschenko O, Murayama Y, Augath M, Steudel T, Evrard HC, Besserve M,  
636 Oeltermann A (2012) Hippocampal-cortical interaction during periods of subcortical  
637 silence. *Nature* 491 (7425):547-553. doi:10.1038/nature11618
- 638 Ma Y, Hamilton C, Zhang N (2017) Dynamic Connectivity Patterns in Conscious and  
639 Unconscious Brain. *Brain connectivity* 7 (1):1-12. doi:10.1089/brain.2016.0464
- 640 Ma Y, Shaik MA, Kozberg MG, Kim SH, Portes JP, Timerman D, Hillman EM (2016) Resting-  
641 state hemodynamics are spatiotemporally coupled to synchronized and symmetric neural  
642 activity in excitatory neurons. *Proc Natl Acad Sci U S A* 113 (52):E8463-E8471.  
643 doi:10.1073/pnas.1525369113
- 644 Ma Z, Perez P, Ma Z, Liu Y, Hamilton C, Liang Z, Zhang N (2018) Functional atlas of the awake  
645 rat brain: A neuroimaging study of rat brain specialization and integration. *Neuroimage*  
646 170:95-112. doi:10.1016/j.neuroimage.2016.07.007
- 647 Ma Z, Zhang N (2018) Temporal transitions of spontaneous brain activity. *eLife* 7.  
648 doi:10.7554/eLife.33562
- 649 Matsui T, Murakami T, Ohki K (2016) Transient neuronal coactivations embedded in globally  
650 propagating waves underlie resting-state functional connectivity. *Proc Natl Acad Sci U S*  
651 *A* 113 (23):6556-6561. doi:10.1073/pnas.1521299113
- 652 Murphy K, Birn RM, Handwerker DA, Jones TB, Bandettini PA (2009) The impact of global signal  
653 regression on resting state correlations: are anti-correlated networks introduced?  
654 *Neuroimage* 44 (3):893-905
- 655 Nalci A, Rao BD, Liu TT (2017) Global signal regression acts as a temporal downweighting  
656 process in resting-state fMRI. *Neuroimage* 152:602-618.  
657 doi:10.1016/j.neuroimage.2017.01.015
- 658 Perez PD, Ma Z, Hamilton C, Sanchez C, Mork A, Pehrson AL, Bundgaard C, Zhang N (2018)  
659 Acute effects of vortioxetine and duloxetine on resting-state functional connectivity in the  
660 awake rat. *Neuropharmacology* 128:379-387. doi:10.1016/j.neuropharm.2017.10.038
- 661 Power JD, Barnes KA, Snyder AZ, Schlaggar BL, Petersen SE (2012) Spurious but systematic  
662 correlations in functional connectivity MRI networks arise from subject motion.  
663 *Neuroimage* 59 (3):2142-2154. doi:10.1016/j.neuroimage.2011.10.018
- 664 Power JD, Schlaggar BL, Petersen SE (2015) Recent progress and outstanding issues in motion  
665 correction in resting state fMRI. *Neuroimage* 105:536-551.  
666 doi:10.1016/j.neuroimage.2014.10.044
- 667 Rack-Gomer AL, Liu TT (2012) Caffeine increases the temporal variability of resting-state BOLD  
668 connectivity in the motor cortex. *Neuroimage* 59 (3):2994-3002.  
669 doi:10.1016/j.neuroimage.2011.10.001
- 670 Raichle ME (2006) Neuroscience. The brain's dark energy. *Science* 314 (5803):1249-1250.  
671 doi:10.1126/science.1134405
- 672 Raichle ME (2010) The brain's dark energy. *Sci Am* 302 (3):44-49

- 673 Ramirez-Villegas JF, Logothetis NK, Besserve M (2015) Diversity of sharp-wave-ripple LFP  
674 signatures reveals differentiated brain-wide dynamical events. *Proc Natl Acad Sci U S A*  
675 112 (46):E6379-6387. doi:10.1073/pnas.1518257112
- 676 Rivera B, Miller S, Brown E, Price R (2005) A novel method for endotracheal intubation of mice  
677 and rats used in imaging studies. *Contemp Top Lab Anim Sci* 44 (2):52-55
- 678 Satterthwaite TD, Wolf DH, Loughhead J, Ruparel K, Elliott MA, Hakonarson H, Gur RC, Gur RE  
679 (2012) Impact of in-scanner head motion on multiple measures of functional connectivity:  
680 relevance for studies of neurodevelopment in youth. *Neuroimage* 60 (1):623-632.  
681 doi:10.1016/j.neuroimage.2011.12.063
- 682 Scholvinck ML, Maier A, Ye FQ, Duyn JH, Leopold DA (2010) Neural basis of global resting-  
683 state fMRI activity. *Proc Natl Acad Sci U S A* 107 (22):10238-10243
- 684 Smith JB, Liang Z, Watson GDR, Alloway KD, Zhang N (2017) Interhemispheric resting-state  
685 functional connectivity of the claustrum in the awake and anesthetized states. *Brain*  
686 *structure & function* 222 (5):2041-2058. doi:10.1007/s00429-016-1323-9
- 687 Smith SM, Fox PT, Miller KL, Glahn DC, Fox PM, Mackay CE, Filippini N, Watkins KE, Toro R,  
688 Laird AR, Beckmann CF (2009) Correspondence of the brain's functional architecture  
689 during activation and rest. *Proc Natl Acad Sci U S A* 106 (31):13040-13045.  
690 doi:10.1073/pnas.0905267106  
691 0905267106 [pii]
- 692 Turchi J, Chang C, Ye FQ, Russ BE, Yu DK, Cortes CR, Monosov IE, Duyn JH, Leopold DA  
693 (2018) The Basal Forebrain Regulates Global Resting-State fMRI Fluctuations. *Neuron*  
694 97 (4):940-952 e944. doi:10.1016/j.neuron.2018.01.032
- 695 Van Dijk KR, Sabuncu MR, Buckner RL (2012) The influence of head motion on intrinsic  
696 functional connectivity MRI. *Neuroimage* 59 (1):431-438.  
697 doi:10.1016/j.neuroimage.2011.07.044
- 698 Wen H, Liu Z (2016) Broadband Electrophysiological Dynamics Contribute to Global Resting-  
699 State fMRI Signal. *J Neurosci* 36 (22):6030-6040. doi:10.1523/JNEUROSCI.0187-  
700 16.2016
- 701 Wong CW, Olafsson V, Tal O, Liu TT (2012) Anti-correlated networks, global signal regression,  
702 and the effects of caffeine in resting-state functional MRI. *Neuroimage* 63 (1):356-364.  
703 doi:10.1016/j.neuroimage.2012.06.035
- 704 Wong CW, Olafsson V, Tal O, Liu TT (2013) The amplitude of the resting-state fMRI global signal  
705 is related to EEG vigilance measures. *Neuroimage* 83:983-990.  
706 doi:10.1016/j.neuroimage.2013.07.057
- 707 Yang GJ, Murray JD, Glasser M, Pearlson GD, Krystal JH, Schleifer C, Repovs G, Anticevic A  
708 (2017) Altered Global Signal Topography in Schizophrenia. *Cereb Cortex* 27 (11):5156-  
709 5169. doi:10.1093/cercor/bhw297
- 710 Yang GJ, Murray JD, Repovs G, Cole MW, Savic A, Glasser MF, Pittenger C, Krystal JH, Wang  
711 XJ, Pearlson GD, Glahn DC, Anticevic A (2014) Altered global brain signal in

712 schizophrenia. Proc Natl Acad Sci U S A 111 (20):7438-7443.  
713 doi:10.1073/pnas.1405289111

714 Yoshida K, Mimura Y, Ishihara R, Nishida H, Komaki Y, Minakuchi T, Tsurugizawa T, Mimura  
715 M, Okano H, Tanaka KF, Takata N (2016) Physiological effects of a habituation procedure  
716 for functional MRI in awake mice using a cryogenic radiofrequency probe. J Neurosci  
717 Methods 274:38-48. doi:10.1016/j.jneumeth.2016.09.013

718 Yushkevich PA, Piven J, Hazlett HC, Smith RG, Ho S, Gee JC, Gerig G (2006) User-guided 3D  
719 active contour segmentation of anatomical structures: significantly improved efficiency  
720 and reliability. Neuroimage 31 (3):1116-1128. doi:10.1016/j.neuroimage.2006.01.015

721 Zhang D, Raichle ME (2010) Disease and the brain's dark energy. Nat Rev Neurol 6 (1):15-28.  
722 doi:10.1038/nrneurol.2009.198

723 Zhang N, Rane P, Huang W, Liang Z, Kennedy D, Frazier JA, King J (2010) Mapping resting-  
724 state brain networks in conscious animals. J Neurosci Methods 189 (2):186-196.  
725 doi:10.1016/j.jneumeth.2010.04.001S0165-0270(10)00186-X [pii]  
726  
727

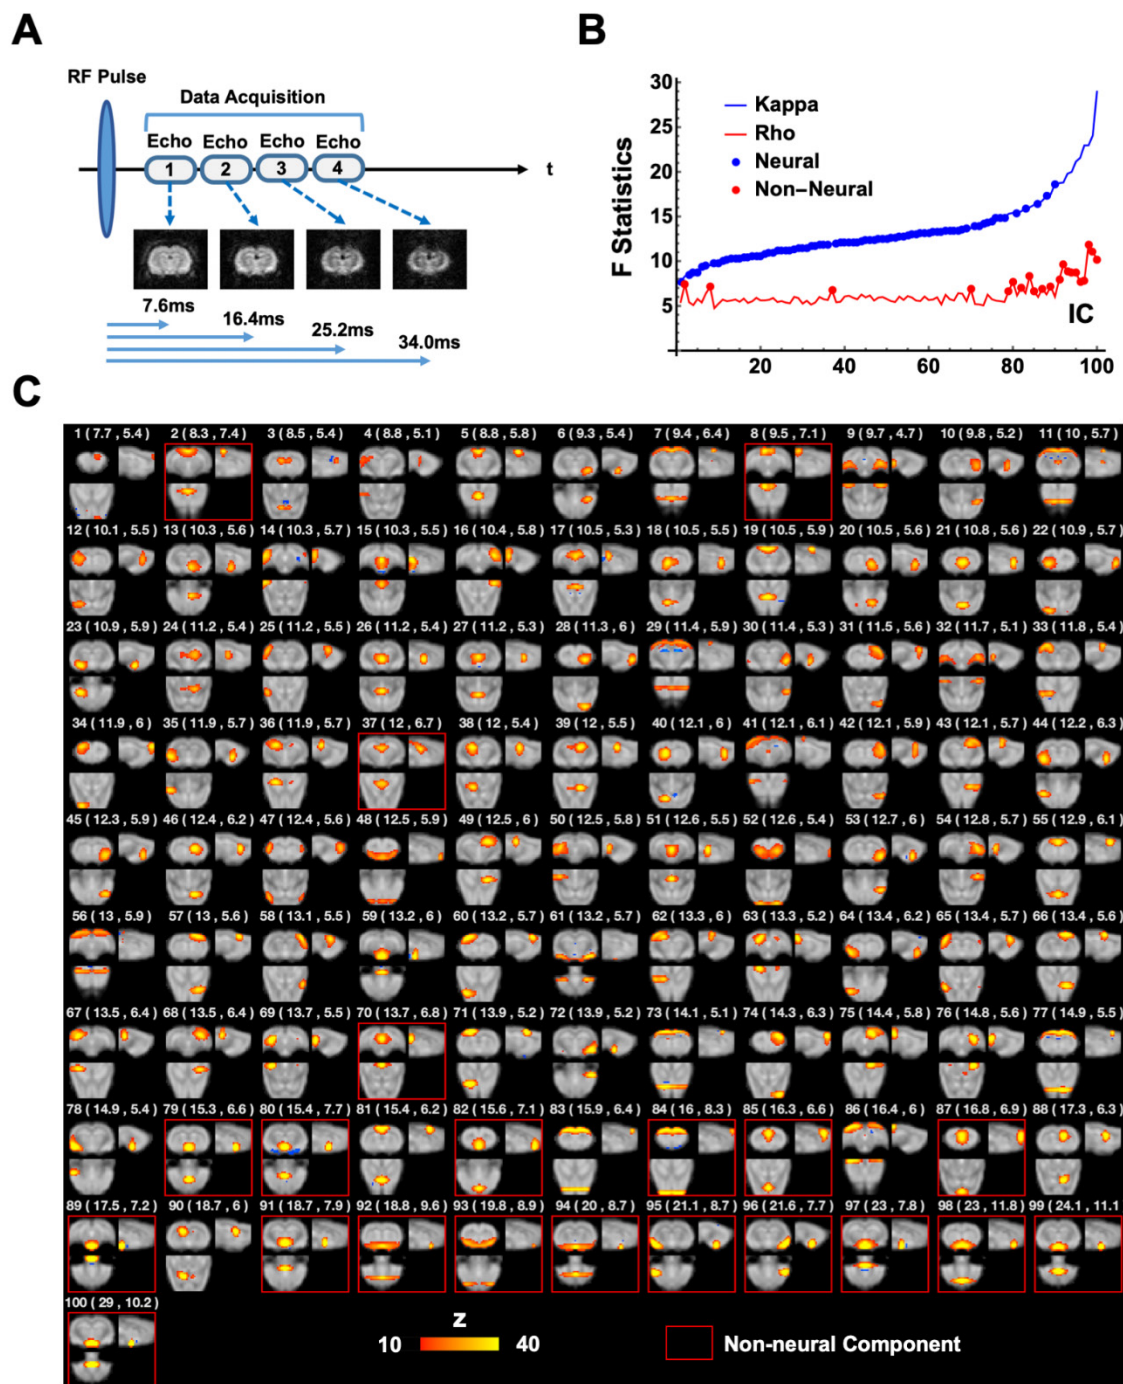

728

729 **Figure 1. ME-EPI data acquisition and processing.** (A) Diagram of the ME-EPI pulse  
 730 sequence. Four images were acquired per rsfMRI volume, each at a different TE. (B)  
 731 BOLD ( $\kappa$ ) or non-BOLD ( $\rho$ ) weights of individual ICA components (blue and red lines),  
 732 sorted by their  $\kappa$  values. 79 neural components (blue dots) and 21 non-neural (red dots)  
 733 were identified. (C) Spatial map, as well as  $\kappa$  and  $\rho$  values (listed in brackets) for each  
 734 individual component. Non-neural components were highlighted by red boxes.

735

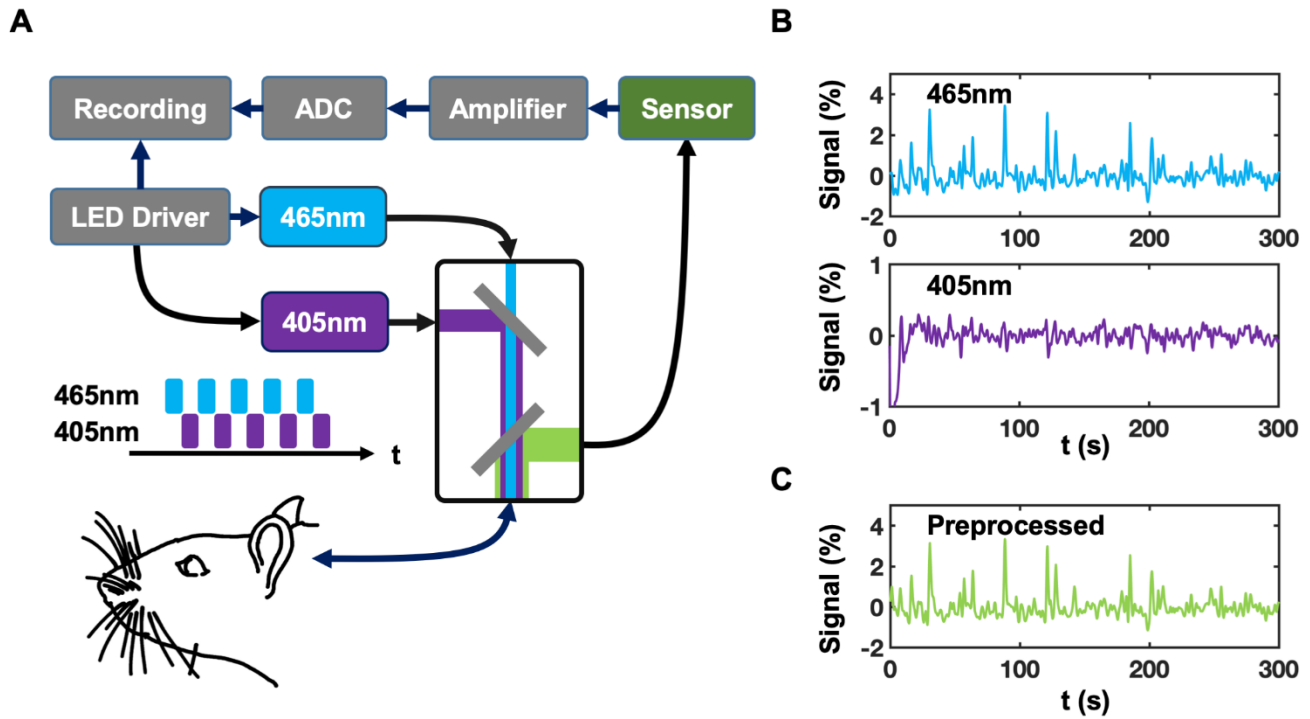

736  
737  
738  
739  
740  
741

**Figure 2. Setup of GCaMP fiber photometry and signal preprocessing.** (A) Setup of the two-wavelength GCaMP fiber photometry system. (B) Signals detected with 465 nm and 405 nm excitation wavelengths, respectively. (C) 405 nm signals were regressed out from 465 nm signals to provide fluorescence changes pertinent to neuronal activity.

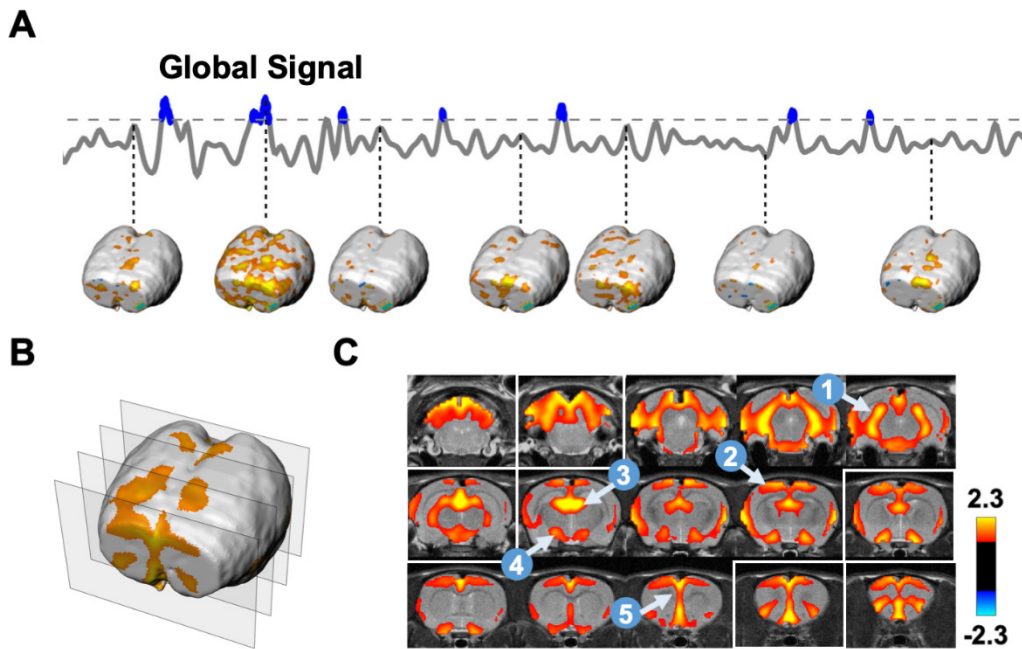

742

743

744

745

746

747

748

749

**Figure 3. Averaged co-activation pattern (CAP) during global signal peaks in SE-rsfMRI data.** (A) Extraction of rsfMRI volumes during global signal peaks. (B) 3D visualization of the averaged CAP during global signal peaks. Positions of the four slices selected were highlighted in white boxes in (C). (C) Slice-by-slice view of the global signal CAP. Five brain regions highlighted include: 1, hippocampus; 2, sensory-motor cortex; 3, medial dorsal thalamus; 4, basal forebrain; 5, prefrontal cortex.



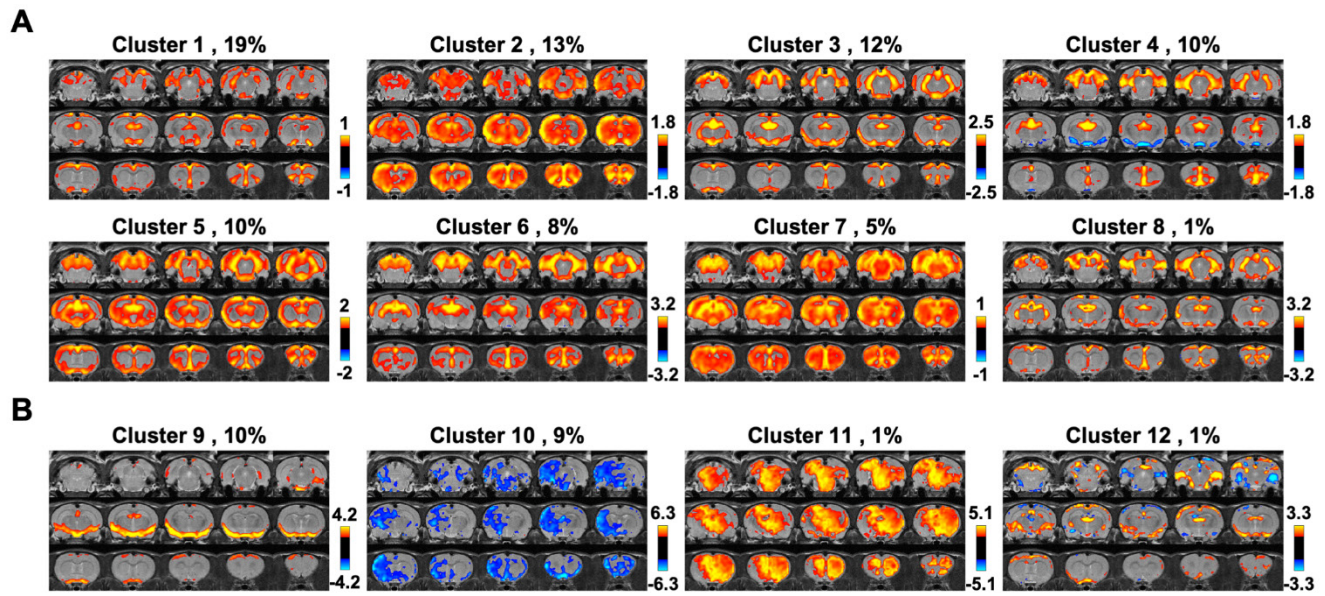

750

751

752

753

754

**Figure 4. Clustering rsfMRI frames during global signal peaks. (A)** Clusters resembling the mean global signal CAP. **(B)** Clusters exhibiting distinct CAPs. The occurrence rate is displayed next to the cluster number.

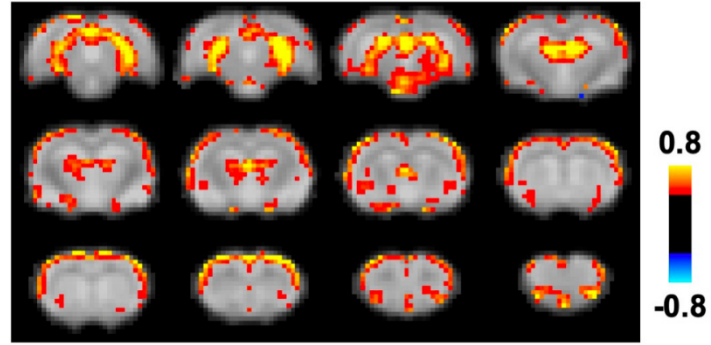

755

756

**Figure 5. Co-activation pattern during global signal peaks in de-noised ME-rsfMRI data.**

757

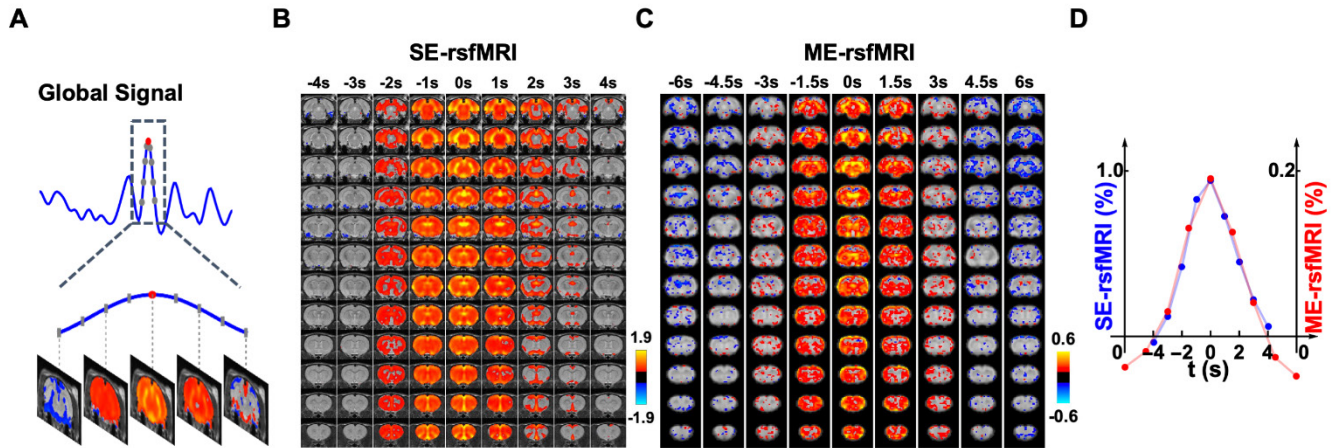

758

759

760

761

762

763

764

765

766

**Figure 6. Spatiotemporal dynamics of the global signal.** (A) An example of a global signal epoch including 8 rsfMRI volumes (gray dots) surrounding a local peak (red dot). (B) Averaged spatiotemporal pattern of global signal epochs in SE-rsfMRI data. Each column represents the averaged spatial pattern of global signal epochs at a time point. (C) Averaged spatiotemporal pattern of global signal epochs in ME-rsfMRI data. (D) Frame-by-frame global signal amplitude averaged across all epochs in SE and ME-rsfMRI data, respectively.

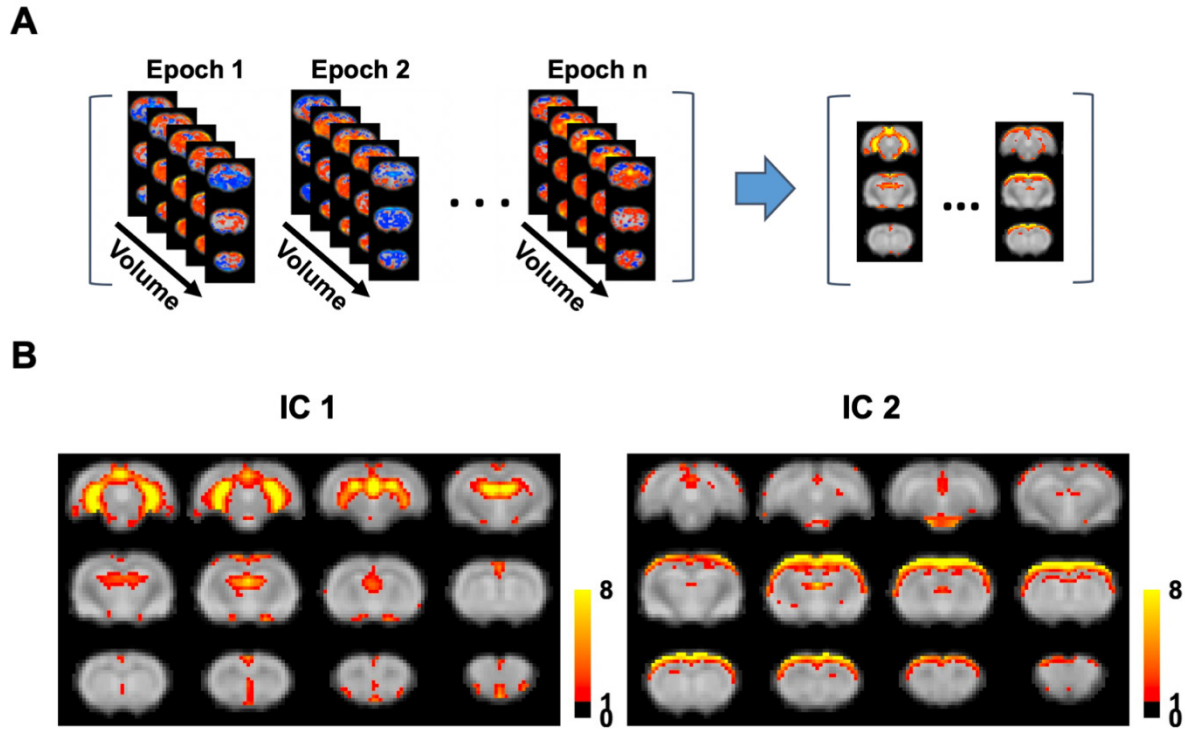

767

768

769

770

771

**Figure 7 Major functional networks involved in the global signal. (A)** Spatial group-ICA applied to all global signal epochs obtained using ME-rsfMRI data. **(B)** Two major functional networks derived from group ICA.

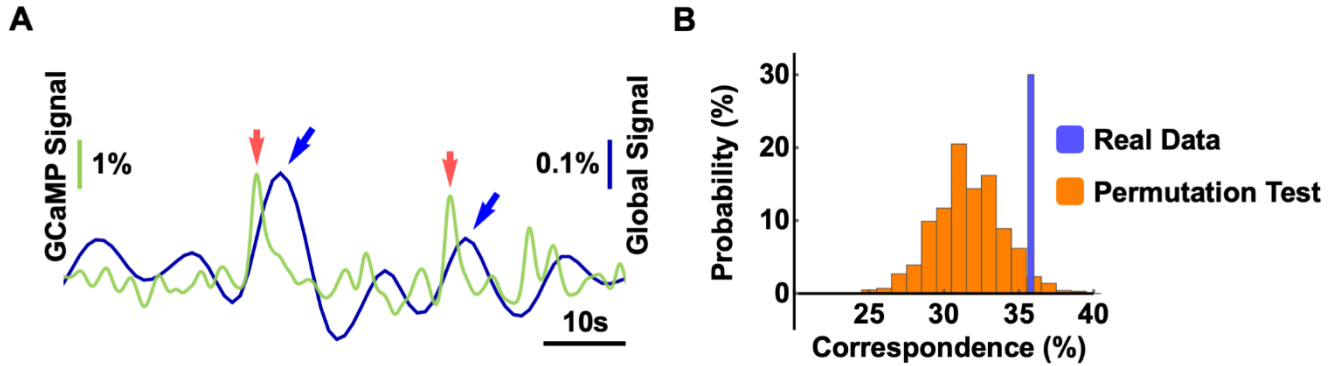

772

773

774

775

776

777

778

779

**Figure 8. Correspondence between the global rsfMRI signal and neuronal spikes in the hippocampus.** (A) Representative time courses of the global rsfMRI signal (blue) and calcium signal (green). Global signal peaks (blue arrows) and neural spikes (red arrows) in the hippocampus were strongly coupled within 2-6 sec of hemodynamic delay. (B) Permutation test of the correspondence between the global signal and GCaMP peaks ( $p = 0.016$ , 1000 permutations).

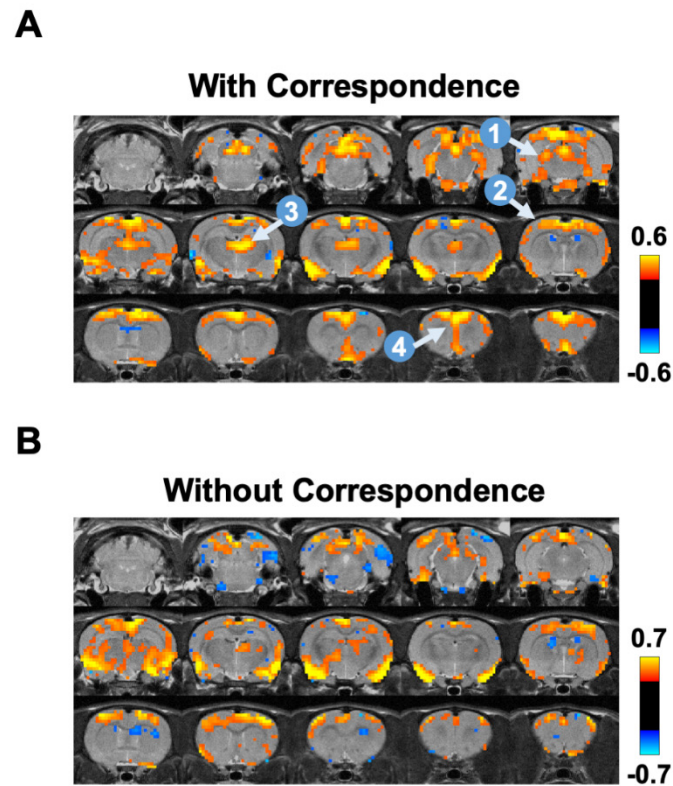

780

781 **Figure 9.** BOLD co-activation patterns during global signal peaks with (A) and without (B)  
782 corresponding GCaMP peaks in the hippocampus. Four brain regions highlighted include:  
783 1, hippocampus; 2, sensory-motor cortex; 3, medial dorsal thalamus; 4, prefrontal cortex.  
784

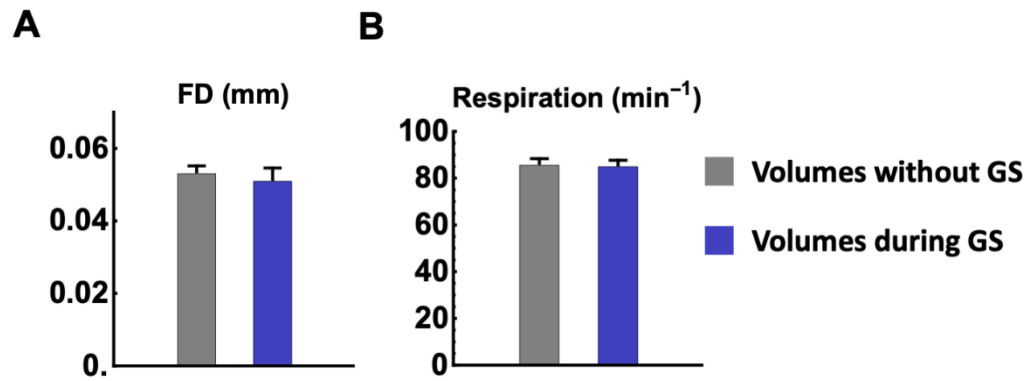

785

786 **Figure 10. Effects of head motion and respiration.** (A) Framewise displacement (FD) and (B)  
787 respiration rate for rsfMRI frames in global signal epochs (blue bars) and rsfMRI frames  
788 not in global signal epochs (gray bars), respectively. No significant difference was found  
789 in head motion level ( $p = 0.61$ ) or respiration ( $p = 0.86$ ).  
790
